## **Evaluation of Seropositivity after Standard Doses of Vaccination against SARS-CoV-2 in Early Breast Cancer Patients Receiving Adjuvant Treatment**

Jinyong Kim<sup>1\*</sup> & Euijin Chang<sup>1\*</sup>, Song Yi Park<sup>1</sup>, Dae-Won Lee<sup>1</sup>, Chang Kyung Kang<sup>1</sup>,  
Pyoeng Gyun Choe<sup>1</sup>, Nam Joong Kim<sup>1</sup>, Myoung-don Oh<sup>1</sup>, Wan Beom Park<sup>1</sup> & Kyung-Hun  
Lee<sup>1,2</sup>, Seock-Ah Im<sup>1,2</sup>

### **Author affiliations**

<sup>1</sup> **Department of Internal Medicine, Seoul National University College of Medicine,  
Seoul National University Hospital, Seoul, Korea**

<sup>2</sup> **Cancer Research Institute, Seoul National University, Seoul, Korea**

**\*Co-first authors**

### **Correspondence to**

Kyung-Hun Lee, MD, PhD

Department of Internal Medicine, Seoul National University Hospital, 101, Daehak-ro,  
Jongro-gu, Seoul 03080, Republic of Korea

Tel: 82-2-2072-7207, E-mail [kyunghunlee@snu.ac.kr](mailto:kyunghunlee@snu.ac.kr)

Wan Beom Park, MD, PhD

Department of Internal Medicine, Seoul National University Hospital, 101, Daehak-ro,  
Jongro-gu, Seoul 03080, Republic of Korea

Tel: 82-2-2072-3596, E-mail [wbpark1@snu.ac.kr](mailto:wbpark1@snu.ac.kr)

## **Author Contributions**

K.L. and W.P. conceptualized the study and set methodology. J.K. and E.C. performed data collection, formal analysis and interpretation. All authors performed data curation. K.L. and W.P. supervised the study. J.K. and E.C. wrote original manuscript. All authors reviewed and provide final approval of the manuscript.

**Keywords:** COVID-19, SARS-CoV-2 vaccines, breast cancer, adjuvant chemotherapy, anti-spike antibody

1 **Abstract**

2 *Background*

3 Coronavirus disease 2019 (COVID-19) pandemic affected millions of individuals and  
4 patients with cancer are known to be more susceptible. Vaccines against SARS-CoV-2 have  
5 been developed and used for patients with cancer, but scarce data is available on their  
6 efficacy in patients under active anti-cancer therapies.

7 *Materials and Methods*

8 In this study, we semi-quantitatively measured the titers of the immunoglobulin G against the  
9 anti-spike protein subunit 1 of SARS-CoV-2 after vaccination in early breast cancer patients  
10 with concurrent chemotherapy, endocrinal or targeted non-cytotoxic treatments, and no  
11 treatments.

12 *Results*

13 Standard doses of COVID-19 vaccines provided sufficient immune responses in patients with  
14 early breast cancer, regardless of the type of anticancer therapies. However, the post-  
15 vaccination serum anti-spike antibody titers were significantly lower in the patients under  
16 cytotoxic chemotherapy.

17 *Conclusion*

18 Our study emphasizes the importance of the personalized risk stratification and consideration  
19 for booster doses in more vulnerable populations.

20

21 **Implications for Practice**

22 In this article, we present rare data on the homogeneous population of patients with early

23 breast cancer under active anti-cancer treatments. The patients showed adequate serologic  
24 responses against SARS-CoV-2 virus after standard doses of vaccination without serious  
25 adverse events in concurrence with active adjuvant anti-cancer therapy. The patients  
26 receiving concurrent cytotoxic chemotherapy, however, have significantly lower serum anti-  
27 spike antibody titers than those under non-cytotoxic anti-cancer treatments or without  
28 treatments. Selection of the COVID-19 vaccines should be based on personalized risk  
29 stratification considering the use of concurrent cytotoxic chemotherapy and the patient's  
30 medical circumstances. Booster doses of vaccination could be considered for the vulnerable  
31 population, such as elderly with comorbidities and the single standard dose of vaccination.

32

33

## 34 **Introduction**

35 Coronavirus disease 2019 (COVID-19) pandemic had affected over the world with 308  
36 million confirmed cases and 5.49 million deaths as of January 12, 2022 <sup>1</sup>. Standard doses of  
37 authorized vaccines against severe acute respiratory syndrome coronavirus 2 (SARS-CoV-2),  
38 which included BNT162b2 vaccine (Pfizer–BioNTech (PZ)), mRNA-1273 vaccine  
39 (Moderna), Ad26.COV2.S vaccine (Janssen)<sup>2</sup>, and AZD1222 vaccine (Oxford-AstraZeneca  
40 (AZ)), provided comparable efficacy in preventing symptomatic COVID-19 with the  
41 acceptable safety profile<sup>3-6</sup>.

42 Patients with cancer have an increased mortality rate due to COVID-19, and are  
43 considered as a prioritized group in need of vaccination by most authorized global guidelines  
44 <sup>7-12</sup>. Nonetheless, patients with cancer under systemic treatments were largely excluded from  
45 the previous clinical trials conducted to assess the efficacy of the COVID-19 vaccines.  
46 Although recent studies reported that the standard dose of vaccine induced adequate  
47 responses in patients with cancers, data on each specific solid cancer needs further  
48 investigation <sup>13,14</sup>.

49 Breast cancer is the leading cause of the cancer deaths in female <sup>15</sup>. Especially, the early  
50 breast cancer confined to the breast and regional lymph nodes accounts for majority of the  
51 total cases <sup>16,17</sup>. Treatments of early breast cancer are usually composed of various modalities  
52 including surgery, radiotherapy, hormonal therapy, molecular targeted therapy, and  
53 chemotherapy with corticosteroid prophylaxis <sup>16</sup>. Thus, the effect of COVID-19 vaccination  
54 should be reevaluated among the patients with early breast cancer who are currently under  
55 different anti-cancer treatments.

56 This study is a prospective study evaluating the serologic responses from standard doses  
57 of COVID-19 vaccines in the patients with early breast cancer, by comparing the antibody

58 responses in the patients on cytotoxic chemotherapy with those in the patients on the other  
59 anti-cancer treatments. We also investigated whether the adjunct corticosteroid affected the  
60 immunologic responses to vaccines in the patients with early breast cancer.

61

## 62 **Materials and methods**

### 63 *Study design and subjects*

64 This is a prospective, longitudinal cohort study that commenced recruitment in April 2021  
65 at Seoul National University Hospital. Early breast cancer patients who are 20 years or older  
66 with the past or current history of systemic anti-cancer treatments for breast cancer, including  
67 cytotoxic chemotherapy, molecule-targeted therapy, and endocrinal therapy were enrolled.  
68 Early breast cancer was defined as the disease confined to the breast with or without regional  
69 lymph node involvement, and without distant metastatic disease. The patients who were  
70 currently under chemotherapy within 28 days of vaccination were included in the cytotoxic  
71 chemotherapy group; patients under targeted therapy and endocrinal therapy were in non-  
72 cytotoxic anti-cancer treatment group; patients who did not receive any anti-cancer treatment  
73 within 28 days of vaccination were in control group. The patients received standard doses of  
74 vaccines, which were either two doses of PZ, Moderna, AZ, or a single dose of Janssen. The  
75 patients who had active infectious diseases or received immune-suppressants or organ  
76 transplant were excluded.

77 The chemotherapy regimen included anthracyclines, cyclophosphamide, docetaxel,  
78 paclitaxel, carboplatin, and capecitabine. Molecular target agents included trastuzumab and  
79 pertuzumab. Hormonal therapies were chosen among tamoxifen, letrozole, and anastrozole  
80 depending on the patient's menopausal status and clinical conditions. The association

81 between corticosteroid use and vaccination was also assessed in the patients who used  
82 corticosteroid over 10mg of prednisolone or equivalent dose within 14 days of vaccination<sup>14</sup>.

83 Our primary endpoint was the immunogenicity of the COVID-19 vaccine in the patients  
84 with early breast cancer under active systemic anti-cancer treatment, defined by the  
85 proportion of patients who achieved positive anti-spike (anti-S1) antibody titer after  
86 vaccination. Secondary outcomes included the association of the prior use of corticosteroids  
87 to immunogenicity of vaccines. Clinical data and samples were collected before the  
88 vaccination, between 21 to 28 days after the first and the second dose of vaccination,  
89 respectively. The study was approved by the Institutional Review Board (IRB No. 2103-121-  
90 1206). Written informed consent was obtained from all participants prior to vaccination. All  
91 the data from the patients were anonymized and de-identified prior to analysis.

92

### 93 *S1-reactive IgG ELISA*

94 We evaluated the antibody responses at baseline and at 3 weeks after each vaccination. We  
95 semi-quantitatively measured the concentration of the immunoglobulin G against the anti-S1  
96 of severe acute respiratory syndrome coronavirus 2 (SARS-CoV-2) using Enzyme-linked  
97 immunosorbent assay (anti-S1 IgG ELISA) (Euroimmun, Lübeck, Germany) according to the  
98 manufacturer's instructions. The immunoassay was granted Emergency Use Authorization by  
99 the US Food and Drug Administration. The cut-off index (COI) of optical density ratio (OD  
100 ratio) greater than or equal to 1.1 was considered seropositive; COI lower than 0.8 was  
101 considered negative; and the rest was considered borderline according to the manufacturer's  
102 instructions. Borderline results were considered as negative for analysis.

103

104 *Statistical analyses*

105 Categorical variables were summarized with the frequencies in number and rates in  
106 percentages. Continuous variables were represented with the median values and ranges.  
107 Differences were assessed using Mann-Whitney test for continuous variables and Pearson's  
108  $\chi^2$  or Fisher's exact test for categorical variables. P-values of  $<0.05$  were considered  
109 statistically significant. The association between treatment with cytotoxic chemotherapy and  
110 the anti-S1 IgG OD ratio in post-vaccination serum was evaluated using a multivariate linear  
111 regression model. The anti-S1 IgG OD ratio was set as the dependent variable and the  
112 treatment with cytotoxic chemotherapy was set as the independent variable. Additional  
113 covariates were age and type of vaccines. The association between treatment with cytotoxic  
114 chemotherapy and the seropositivity based on OD ratio was evaluated using a logistic  
115 regression model. Data and statistical analyses were performed in R version 4.1.2 and  
116 RStudio version 2021.09.1.

117

118 **Results**

119 *Patient characteristics*

120 We recruited 112 patients with early breast cancer who received adjuvant cytotoxic  
121 chemotherapy and at least one dose of COVID-19 vaccine. Twelve patients withdrew from  
122 the study, and another twelve samples were not available for the analysis at the time of data  
123 collection. One case was excluded because of the high baseline anti-S1 antibody level,  
124 suggestive of COVID-19 infection prior to vaccination (Figure 1). Of all, 80.5% (70 of 87)  
125 received PZ; 10.3% (9 of 87) received Moderna; 3.4% (3 of 87) received Janssen; 5.7% (5 of  
126 87) received AZ. Except for the three patients who received single dose of Janssen, 84



127 patients received two doses of vaccines without cross-injection. The median interval between  
128 the first and second vaccination was 42 days (range, 21-77). The median age of patients was  
129 52 years (range 35-69) and all were female. Within 28 days of vaccination, 36.8% (32 of 87)  
130 underwent cytotoxic chemotherapy and 9.2% (8 of 87) had combination with targeted therapy.  
131 Patients who received non-cytotoxic anti-cancer therapy were 42.5% (37 of 87). Only one  
132 patient was under molecular targeted therapy, and other 36 patients were under endocrinal  
133 therapy. The patients who had no anti-cancer treatment within 28 days of vaccination were  
134 20.7% (18 of 87). No serious adverse events were reported. The patient characteristics are  
135 shown in Table1.

136

#### 137 *Vaccine immunogenicity with active chemotherapy*

138 Overall, 96.6% (84 of 87) were seropositive after completion of vaccinations. After first  
139 dose, 70.1% (61 of 87) were seropositive, and additional 25.3% (22 of 87) gained  
140 seropositivity after second dose (Figure 2, Table S1). Three patients failed seroconversion;  
141 two were in borderline range and one was seronegative. Two patients in borderline range  
142 received two doses of PZ vaccine during adjuvant doxorubicin and cyclophosphamide  
143 chemotherapy. The only seronegative patient received one dose of Janssen while on letrozole  
144 (Table S2).

145 Only 31.2% (10 of 32) in the chemotherapy group, compared with 91.9% (34 of 37) in the  
146 non-cytotoxic treatment group and 94.4% (17 of 18) in the control group, achieved the  
147 adequate immunoglobulin level after the first dose. However, the majority (93.8%, 30 of 32)  
148 of the patients in chemotherapy group achieved seropositivity after the second dose. In the  
149 non-cytotoxic treatment group and control group, all patients who received two doses of  
150 vaccination were seropositive. There was no significant difference in seroconversion rate

151 after the completion of vaccination among the cytotoxic chemotherapy group, non-cytotoxic  
152 treatment group, and control group (93.8% vs. 97.3% vs. 100%,  $p=0.234$ ). No significant  
153 association was observed in seropositivity regarding age, types of vaccines, and treatments  
154 with cytotoxic chemotherapy (Table S3).

155 Anti-S1 antibody levels increased gradually with each vaccination in all patients, with more  
156 than 50 folds after the first dose and 137 folds after the second dose (Figure S1). Both mRNA  
157 or adenovirus vector vaccines showed significant increase in antibody titers (Figure S2), and  
158 no significant difference was observed in the anti-S1 antibody titer at each time point.

159 When the antibody titers in the chemotherapy group, the non-cytotoxic treatment group,  
160 and the control group were compared, the antibody titers also significantly and gradually  
161 increased in all groups after the first and second vaccinations. Despite similar baseline levels,  
162 however, significantly lower magnitudes of antibody titers was observed in patients who had  
163 concurrent cytotoxic chemotherapy, compared to those in the non-cytotoxic treatment group  
164 or those in the control group after first vaccination (cytotoxic chemotherapy vs. non-cytotoxic  
165 treatment vs. control, 10.7 vs. 84.2 vs. 69.8-fold increase respectively,  $p<0.001$ ) and second  
166 vaccination (95.4 vs. 142.1 vs. 132.4-fold increase respectively,  $p<0.001$  for cytotoxic vs.  
167 non-cytotoxic and  $p=0.005$  for cytotoxic vs. control) (Figure 3, Table 2). In the linear  
168 regression and multiple regression analyses adjusted for age, the treatment with cytotoxic  
169 chemotherapy remained as a significant factor for predicting low anti-S1 antibody titer  
170 ( $p<0.001$ ). No significant association was observed between the antibody titers with types of  
171 vaccines (Table S4, S5).

172

173 *Vaccine immunogenicity with corticosteroid use*

174 Corticosteroid was used within 14 days before the vaccination in 20.9% (18 of 87) of the  
175 patients, all of whom were in the chemotherapy group. The association between  
176 corticosteroid use and antibody titer was only assessed in chemotherapy group to control the  
177 effect of chemotherapy to immunogenicity. There was no significant difference in the  
178 antibody titers between the patients who received corticosteroid in concurrence with  
179 chemotherapy and those who only received chemotherapy at the time of vaccination (Figure  
180 4).

181

## 182 **Discussion**

183 In this prospective study, standard regimen of COVID-19 vaccination generated sufficient  
184 amount of IgG antibody titers against SARS-CoV-2 virus in most of the early breast cancer  
185 patients who had adjuvant anti-cancer treatments. The rate of seropositivity was numerically  
186 comparable to that of the previous studies performed in patients with cancer <sup>13,14,18,19</sup>. It is  
187 well known that the anti-spike antibody titer is correlated with the protection from COVID-  
188 19 <sup>20-23</sup>. The emergence of neutralizing antibodies at early onset was associated with the  
189 shorter time for negative conversion of swab culture, while the lack of neutralizing antibody  
190 was associated with a fatal outcome in symptomatic COVID-19 patients <sup>20</sup>. Known as a good  
191 surrogate marker of neutralizing antibody titers <sup>20,23</sup>, the anti-spike antibody levels measured  
192 with EUROIMMUN ELISA kit also reported strong positive correlation with the neutralizing  
193 antibody titers assessed by a microneutralization assay <sup>21</sup>. All in all, patients with breast  
194 cancer under concurrent adjuvant cytotoxic chemotherapy, when compared with those under  
195 molecular targeted therapy, endocrine therapy, or no anti-cancer treatments, were capable of  
196 acquiring adequate protections against COVID-19 infection after vaccinations, irrespective of  
197 age and types of vaccines.

198 Cytotoxic chemotherapy, however, was significantly associated with lower IgG antibody  
199 titers after both first and second dose of vaccinations despite the equivalent seroconversion  
200 rate. About 7.8-fold difference was observed between the cytotoxic chemotherapy group and  
201 non-cytotoxic treatment group after the first dose of vaccine, which decreased to 1.5-folds  
202 after the second dose. A cohort study reported that the anti-spike IgG titers of patients with  
203 solid cancer was 3.7-folds lower than those of healthy relatives after the second dose of Pfizer  
204 vaccination <sup>13</sup>. Moreover, two of the patients were under adjuvant cytotoxic chemotherapy  
205 before PZ vaccine showed borderline range of anti-S1 IgG levels. In PZ vaccination trial, the  
206 median IgG titer was statistically significantly lower in the patients under active cancer  
207 treatments with healthy controls <sup>13</sup>. Booster dose of vaccinations may be considered in the  
208 cancer patients under active cytotoxic treatments for a robust protection against SARS-CoV-2.

209 The only patient who was seronegative had received one dose of Janssen while on  
210 endocrinal therapy, and had completed cytotoxic chemotherapy 47 days before vaccination.  
211 Meanwhile, two other patients who had received Janssen vaccine experienced sufficient  
212 seroconversion after the first dose between cycles of cytotoxic chemotherapies. One possible  
213 speculation would be their ages. The seronegative patient was over 65 years old while other  
214 two seropositive patients were in their 40s and 50s. In the phase I/II trial of Janssen vaccine,  
215 the participants of 60 years or older had lower incidence of seroconversion <sup>24</sup>. In the subgroup  
216 analysis of ENSEMBLE trial, lower efficacy of preventing the severe-critical COVID-19 was  
217 observed among participants of 60 years or older with comorbidities <sup>6</sup>. Individual medical  
218 circumstances should be taken into account in choosing the type of vaccines, and booster  
219 doses should be considered for vulnerable populations.

220 The non-cytotoxic treatment group treated with endocrinal therapy and monoclonal anti-  
221 HER-2 therapy showed similar seroconversion rates and anti-S1 antibody titers when

222 compared to control group. Previous study reported higher rates of post-vaccination  
223 seroconversion in patients on endocrine therapy including ovarian function suppression and  
224 aromatase inhibitors compared with the other groups<sup>18</sup>. Only scarce data was available  
225 regarding the impact of the trastuzumab to the efficacy of the vaccines. One study about  
226 influenza vaccination reported that breast cancer patients receiving adjuvant trastuzumab had  
227 sufficient increase of immunogenicity and equivalent serological protection rate as healthy  
228 controls<sup>25</sup>.

229 It had been widely believed that the use of systemic corticosteroid may affect T and B cell  
230 functions. For example, patients with sustained high-dose corticosteroids were associated  
231 with poor pneumococcal polysaccharide vaccine response and more infections<sup>26</sup>. In our study,  
232 corticosteroids over 10mg of prednisolone or equivalent dose within 14 days of vaccination  
233 apparently seemed to diminish the amount of antibody titers. But corticosteroids were  
234 administered as the premedication for taxanes, and none of the control group used  
235 corticosteroids. When the factor of cytotoxic chemotherapy was adjusted, there was no  
236 difference in the antibody titers with corticosteroid treatments. A recent study also reported  
237 that the short term use of corticosteroids significantly relieved side effects without hindering  
238 immunogenicity after the first dose of AZ vaccine<sup>27</sup>. In our study, adjunctive corticosteroids  
239 were used shortly, and thus minimally impeded the immunologic responses driven by  
240 vaccines.

241 Our data is limited by the relatively small number of patients, especially those who had  
242 adenovirus vector vaccines. Unfortunately, only one patient was treated with trastuzumab that  
243 the analysis of the effect of molecular target therapy on immunogenicity of vaccines was  
244 unavailable. Immune checkpoints inhibitors, which are not yet approved as adjuvant  
245 treatment for breast cancer, were not included in the study. However, this study was

246 successful in recruiting a homogeneous population of the early breast cancer patients  
247 undergoing adjuvant anti-cancer treatments. We also evaluated the effects of corticosteroid  
248 use to the seroconversion, which is commonly used in adjunct to cytotoxic chemotherapy.  
249 Another pitfall was the possibility of the seroconversion by asymptomatic COVID-19  
250 infections, because the regular COVID-19 PCR screenings were not done. T cell responses,  
251 known as important in immunity against COVID-19, were also not evaluated. Further studies  
252 with more patient data would strengthen our knowledge in understanding the immunologic  
253 responses after vaccination in the patients with cancer.

254

255

## 256 **Conclusion**

257 Patients with early breast cancer undergoing adjuvant anti-cancer therapy showed adequate  
258 serologic responses against SARS-CoV-2 virus after vaccination without serious adverse  
259 events. Selection of the COVID-19 vaccines should be personalized, taking the patient's  
260 medical circumstances into account. Booster doses of vaccination could be considered for the  
261 vulnerable populations.

262

## 263 Reference:

264 1. Coronavirus Disease (COVID-19). (January 12, 2022 )

265 2. Tregoning JS, Flight KE, Higham SL, Wang Z, Pierce BF. Progress of the COVID-19  
266 vaccine effort: viruses, vaccines and variants versus efficacy, effectiveness and escape. *Nat*  
267 *Rev Immunol*. Oct 2021;21(10):626-636. doi:10.1038/s41577-021-00592-1

268 3. Polack FP, Thomas SJ, Kitchin N, et al. Safety and Efficacy of the BNT162b2 mRNA

- 269 Covid-19 Vaccine. *New England Journal of Medicine*. 2020;383(27):2603-2615.  
270 doi:10.1056/NEJMoa2034577
- 271 4. Voysey M, Clemens SAC, Madhi SA, et al. Safety and efficacy of the ChAdOx1 nCoV-19  
272 vaccine (AZD1222) against SARS-CoV-2: an interim analysis of four randomised controlled  
273 trials in Brazil, South Africa, and the UK. *The Lancet*. 2021;397(10269):99-111.  
274 doi:10.1016/S0140-6736(20)32661-1
- 275 5. Baden LR, El Sahly HM, Essink B, et al. Efficacy and Safety of the mRNA-1273 SARS-  
276 CoV-2 Vaccine. *New England Journal of Medicine*. 2020;384(5):403-416.  
277 doi:10.1056/NEJMoa2035389
- 278 6. Sadoff J, Gray G, Vandebosch A, et al. Safety and Efficacy of Single-Dose Ad26.COV2.S  
279 Vaccine against Covid-19. *New England Journal of Medicine*. 2021;384(23):2187-2201.  
280 doi:10.1056/NEJMoa2101544
- 281 7. NCCN. Cancer and COVID-19 Vaccination version 4.0. Accessed January 12, 2022,  
282 [https://www.nccn.org/docs/default-source/covid-19/2021\\_covid-](https://www.nccn.org/docs/default-source/covid-19/2021_covid-19_vaccination_guidance_v4-0.pdf?sfvrsn=b483da2b_70)  
283 [19\\_vaccination\\_guidance\\_v4-0.pdf?sfvrsn=b483da2b\\_70](https://www.nccn.org/docs/default-source/covid-19/2021_covid-19_vaccination_guidance_v4-0.pdf?sfvrsn=b483da2b_70)
- 284 8. Marina Chiara Garassino NG, Petros Grivas, Karin Jordan, Francesca Lucibello, Olivier  
285 Mir, George Pentheroudakis, Florian Scotté, Marie von Lilienfeld-Toal, Giuseppe Curigliano,  
286 John Haanen, Uwe Gerd Liebert, Florian Lordick, Ignacio Melero, Corinna Pietsch, and  
287 Solange Peters. COVID-19 vaccination in cancer patients: ESMO statements. . Accessed  
288 January 12, 2022, <https://www.esmo.org/covid-19-and-cancer/covid-19-vaccination>
- 289 9. Robilotti EV, Babady NE, Mead PA, et al. Determinants of COVID-19 disease severity in  
290 patients with cancer. *Nature Medicine*. 2020/08/01 2020;26(8):1218-1223.  
291 doi:10.1038/s41591-020-0979-0
- 292 10. Rugge M, Zorzi M, Guzzinati S. SARS-CoV-2 infection in the Italian Veneto region:  
293 adverse outcomes in patients with cancer. *Nature Cancer*. 2020/08/01 2020;1(8):784-788.

294 doi:10.1038/s43018-020-0104-9

295 11. Rivera DR, Peters S, Panagiotou OA, et al. Utilization of COVID-19 Treatments and  
296 Clinical Outcomes among Patients with Cancer: A COVID-19 and Cancer Consortium  
297 (CCC19) Cohort Study. *Cancer Discov.* 2020;10(10):1514-1527. doi:10.1158/2159-8290.CD-  
298 20-0941

299 12. Wang Q, Berger NA, Xu R. Analyses of Risk, Racial Disparity, and Outcomes Among US  
300 Patients With Cancer and COVID-19 Infection. *JAMA Oncology.* 2021;7(2):220-227.  
301 doi:10.1001/jamaoncol.2020.6178

302 13. Massarweh A, Eliakim-Raz N, Stemmer A, et al. Evaluation of Seropositivity Following  
303 BNT162b2 Messenger RNA Vaccination for SARS-CoV-2 in Patients Undergoing Treatment  
304 for Cancer. *JAMA Oncology.* 2021;7(8):1133-1140. doi:10.1001/jamaoncol.2021.2155

305 14. Fendler A, Shepherd STC, Au L, et al. Adaptive immunity and neutralizing antibodies  
306 against SARS-CoV-2 variants of concern following vaccination in patients with cancer: the  
307 CAPTURE study. *Nature Cancer.* 2021/10/27 2021;doi:10.1038/s43018-021-00274-w

308 15. 2020 G. Accessed January 12th, 2022, <https://gco.iarc.fr/>

309 16. Cardoso F, Kyriakides S, Ohno S, et al. Early breast cancer: ESMO Clinical Practice  
310 Guidelines for diagnosis, treatment and follow-up<sup>&#x2020;</sup>. *Annals of Oncology.*  
311 2019;30(8):1194-1220. doi:10.1093/annonc/mdz173

312 17. Kang SY, Kim YS, Kim Z, et al. Breast Cancer Statistics in Korea in 2017: Data from a  
313 Breast Cancer Registry. *J Breast Cancer.* 4/ 2020;23(2):115-128.

314 18. Thakkar A, Gonzalez-Lugo JD, Goradia N, et al. Seroconversion rates following COVID-  
315 19 vaccination among patients with cancer. *Cancer Cell.* 2021/08/09/ 2021;39(8):1081-  
316 1090.e2. doi:<https://doi.org/10.1016/j.ccell.2021.06.002>

317 19. Oosting S VdVA, GeurtsvanKessel CH, et al. Vaccination against SARS-CoV-2 in  
318 patients receiving chemotherapy, immunotherapy, or chemo-immunotherapy for solid tumors.



- 319 *Annals of Oncology* 2021;32(supplement 5):S1283-S1346.
- 320 20. Dispinseri S, Secchi M, Pirillo MF, et al. Neutralizing antibody responses to SARS-CoV-  
321 2 in symptomatic COVID-19 is persistent and critical for survival. *Nature Communications*.  
322 2021/05/11 2021;12(1):2670. doi:10.1038/s41467-021-22958-8
- 323 21. Dolscheid-Pommerich R, Bartok E, Renn M, et al. Correlation between a quantitative  
324 anti-SARS-CoV-2 IgG ELISA and neutralization activity. *Journal of Medical Virology*.  
325 2022;94(1):388-392. doi:<https://doi.org/10.1002/jmv.27287>
- 326 22. Salazar E, Kuchipudi SV, Christensen PA, et al. Relationship between Anti-Spike Protein  
327 Antibody Titers and SARS-CoV-2 In Vitro Virus Neutralization in Convalescent Plasma.  
328 *bioRxiv*. 2020:2020.06.08.138990. doi:10.1101/2020.06.08.138990
- 329 23. Wajnberg A, Amanat F, Firpo A, et al. Robust neutralizing antibodies to SARS-CoV-2  
330 infection persist for months. *Science*. 2020;370(6521):1227-1230.  
331 doi:doi:10.1126/science.abd7728
- 332 24. Sadoff J, Le Gars M, Shukarev G, et al. Interim Results of a Phase 1–2a Trial of  
333 Ad26.COV2.S Covid-19 Vaccine. *New England Journal of Medicine*. 2021;384(19):1824-  
334 1835. doi:10.1056/NEJMoa2034201
- 335 25. Joon TB, Digkas E, Wennstig A-K, et al. Influenza vaccination in breast cancer patients  
336 during subcutaneous trastuzumab in adjuvant setting. *Breast Cancer Research and Treatment*.  
337 2020/11/01 2020;184(1):45-52. doi:10.1007/s10549-020-05815-y
- 338 26. Fischer L, Gerstel PF, Poncet A, et al. Pneumococcal polysaccharide vaccination in adults  
339 undergoing immunosuppressive treatment for inflammatory diseases--a longitudinal study.  
340 *Arthritis Res Ther*. Jun 6 2015;17(1):151. doi:10.1186/s13075-015-0663-9
- 341 27. Yang J, Ko J-H, Baek JY, et al. Effects of Short-Term Corticosteroid Use on  
342 Reactogenicity and Immunogenicity of the First Dose of ChAdOx1 nCoV-19 Vaccine.  
343 Perspective. *Frontiers in Immunology*. 2021-September-22

344 2021;12(3908)doi:10.3389/fimmu.2021.744206

345

346

347 **Figures and Tables**

348 Figure 1. Patient enrollment: Flowchart showing the patient enrollment and selection

349 Figure 2. Proportion of seroconversion in patients: Seroprevalence proportions in (A) all  
350 early breast cancer patients, (B) with cytotoxic chemotherapy treatments, (C) with non-  
351 cytotoxic treatments, and (D) without anti-cancer treatment.

352 Figure 3. Antibody titers with Anti-Cancer treatments: SARS-CoV-2 anti-S IgG antibody  
353 titers after each dose of vaccinations in early breast cancer patients with cytotoxic  
354 chemotherapy treatment, with non-cytotoxic treatment, and without anti-cancer treatment

355 Figure 4. Antibody titers with steroid treatments in chemotherapy group: Comparison of  
356 SARS-CoV-2 anti-S IgG antibody titers after each dose of vaccinations with and without  
357 corticosteroid treatments in cytotoxic chemotherapy group

358

359 Table 1. Patients' characteristics

360 Table 2. Antibody titers with Anti-Cancer treatments

361

362 **Supplementary Figures & Tables**

363 Figure S1. Antibody titers with vaccinations in all patients: SARS-CoV-2 anti-S IgG titers  
364 after each dose of vaccinations in all early breast cancer patients

365 Figure S2. Antibody titers by vaccine types: SARS-CoV-2 anti-S IgG titers after each dose of  
366 Adenoviral vaccines and mRNA vaccines

367 Figure S3. Antibody titers with steroid use: SARS-CoV-2 anti-S IgG titers in adjunct with  
368 steroid use of more than or equivalent to prednisolone 10mg within 14 days of each dose of  
369 vaccinations

370

371 Table S1. Seroprevalence of early breast cancer patients

372 Table S2. Characteristics of Patients who Failed Seroconversion

373 Table S3. Univariable logistic regression analysis for seropositivity

374 Table S4. Univariable Linear Regression Analysis for OD values

375 Table S5. Multiple Regression Analysis for OD values

376

377 **Data availability**

378 The datasets generated during and/or analyzed during the current study are available from the  
379 corresponding author on reasonable request.

380

381 **Acknowledgments**

382 We thank Areum Jo for technical support.

383

384 **Fundings**

385 This work was supported in part by grant no 04-2021-0250 from the SNUH Research Fund  
386 and by the Bio & Medical Technology Development Program of the National Research  
387 Foundation (NRF) & funded by the Korean government (MSIT)(2021M3A9I2080498)

388

389 **Ethics declarations**

390 **Competing interests:** The authors declare no competing interests.

391

392

112 patients recruited

12 patients withdrew

100 patients enrolled

12 patients with  
incomplete samplings

88 patients analyzed  
with baseline samples

1 patients had prior  
COVID-19 infection

87 patients finally  
analyzed

Percentage of patients (%)

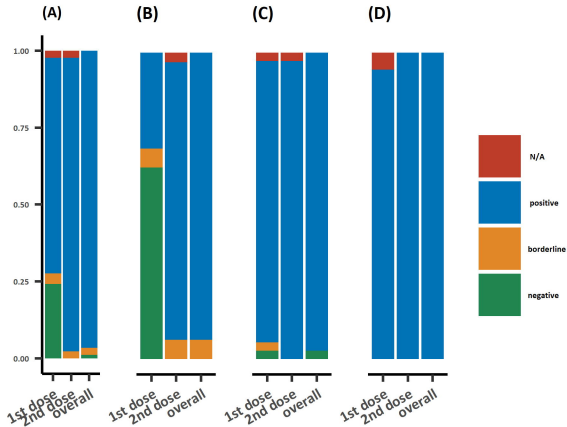

Anti-S1 IgG Titer (OD ratio)

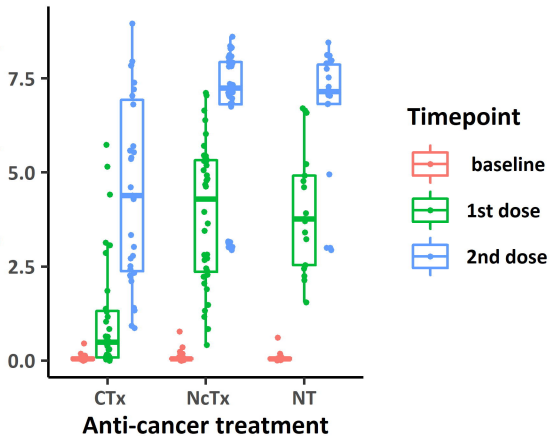



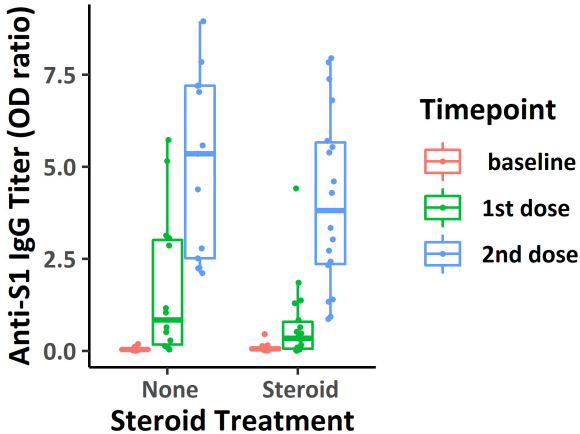

Table 1. Patients' characteristics

|                                               | All        | Cytotoxic<br>chemotherapy | Non-cytotoxic<br>anticancer<br>treatment | No treatment |
|-----------------------------------------------|------------|---------------------------|------------------------------------------|--------------|
| Total number                                  | 87         | 32 (36.8%)                | 37 (42.5%)                               | 18 (20.7%)   |
| Age (median, range)                           | 52 (35-69) | 52 (35-69)                | 49 (36-69)                               | 51.5 (40-61) |
| Vaccine                                       |            |                           |                                          |              |
| PZ                                            | 70 (80.5%) | 22 (68.8%)                | 32 (86.5%)                               | 16 (88.9%)   |
| Moderna                                       | 9 (10.3%)  | 5 (15.6%)                 | 4 (10.8%)                                | 0 (0.0%)     |
| Janssen                                       | 3 (3.4%)   | 2 (6.2%)                  | 1 (2.7%)                                 | 0 (0.0%)     |
| AZ                                            | 5 (5.7%)   | 3 (9.4%)                  | 0 (0.0%)                                 | 2 (11.1%)    |
| Anticancer treatments                         |            |                           |                                          |              |
| <28 days before the<br>vaccination            |            |                           |                                          |              |
| Chemotherapy only                             | 24 (27.6%) | 24 (75.0%)                | 0 (0.0%)                                 | 0 (0.0%)     |
| Chemotherapy +<br>targeted therapy            | 8 (9.2%)   | 8 (25.0%)                 | 0 (0.0%)                                 | 0 (0.0%)     |
| Targeted therapy                              | 1 (1.1%)   | 0 (0.0%)                  | 1 (2.7%)                                 | 0 (0.0%)     |
| Endocrine therapy                             | 36 (41.4%) | 0 (0.0%)                  | 36 (97.3%)                               | 0 (0.0%)     |
| No anticancer<br>treatment                    | 18 (20.7%) | 0 (0.0%)                  | 0 (0.0%)                                 | 18 (100.0 %) |
| Surgery <28 days<br>before the<br>vaccination |            |                           |                                          |              |
|                                               | 5 (5.7%)   | 5 (15.6%)                 | 0 (0.0%)                                 | 0 (0.0%)     |

---

Corticosteroids

( $\geq 10$  mg prednisolone

equivalent) <14 days 18 (20.9%) 18 (56.2%) 0 (0.0%) 0 (0.0%)

before the

vaccination

---

Abbreviations: PZ, Pfizer; AZ, AstraZeneca.

Table 2. Antibody titers with Anti-Cancer treatments

| <b>Median<br/>(1<sup>st</sup>-3<sup>rd</sup><br/>quartile)</b> | <b>All</b>             | <b>Chemotherapy</b>    | <b>Non-cytotoxic<br/>therapy</b> | <b>No treatment</b>    |
|----------------------------------------------------------------|------------------------|------------------------|----------------------------------|------------------------|
| OD ratio<br>(baseline)                                         | 0.051<br>(0.019-0.081) | 0.046<br>(0.028-0.089) | 0.051<br>(0.037-0.069)           | 0.054<br>(0.031-0.080) |
| OD ratio<br>(1 <sup>st</sup> dose)                             | 2.680<br>(0.844-4.833) | 0.494<br>(0.081-1.338) | 4.294<br>(2.334-5.343)           | 3.769<br>(2.542-4.921) |
| OD ratio<br>(2 <sup>nd</sup> dose)                             | 7.028<br>(3.133-7.842) | 4.388<br>(2.381-6.927) | 7.249<br>(6.790-7.941)           | 7.152<br>(6.817-7.901) |

Abbreviations: OD, optical density.
