# Supplementary material for: Evaluation of Seropositivity after Standard Doses of Vaccination against SARS-CoV-2 in Early Breast Cancer Patients Receiving Adjuvant Treatment
Source: medRxiv preprint, doi:10.1101/2022.07.23.22277888, version 1 (2022-07-24)
Supplement: Supplementary Table 2 [file 277888_file12.docx]

Table S2. Characteristics of patients who failed seroconversion

| Patient | Vaccine | Anti-cancer treatment | Vaccine interval (days) | Steroid <14 days  before the vaccination | NSAIDs <14 days  before the vaccination | Serology |
| --- | --- | --- | --- | --- | --- | --- |
| 1 | Janssen | Femara | N/A | No | N/A | Negative |
| 2 | PZ | Docetaxel after AC | 21 | Yes | No | Borderline |
| 3 | PZ | Docetaxel after AC | 32 | Yes | Yes | Borderline |

Abbreviations: PZ, Pfizer.
